# Supplementary material
Source: publisher site journal article supplement (https://www.dovepress.com/article/246607)
Supplement: Supplementary file 1 [file get_supplementary_file.php]

**Supplement Table 1**: Comparison of laboratory parameters between patients and controls

| Parameters | SS (N=101)  Median (Range) | Controls (N=64)  Median (Range) | Test statistics P value |
| --- | --- | --- | --- |
| HbF (%) | 8.4 (0.9 – 32.3) | 0.9 (0 – 5.8) | **p˂0.0001** |
| LDH (IU/L) | 771 (197 – 1860) | 345(150 – 840) | **p˂0.0001** |
| Hb (g/dL) | 7.4 (6.3 – 11.2) | 11.6 (7.8 – 14.8) | **p˂0.0001** |
| WBC (x 103/uL) | 12.6 (6.1 – 29.3) | 6.6 (4.5 – 14.4) | **p˂0.0001** |
| Platelet (x 103/uL) | 343 (118 – 832) | 278 (108 – 591) | **p˂0.0001** |
| Total Bilirubin (mg/dL) | 1.8 (0.42– 8.1) | 0.4 (0.1– 2.2) | **p˂0.0001** |
| Unconjugated bilirubin (mg/dL) | 0.8 (0.1 -6.3) | 0.2 (0.03 -0.8) | **p˂0.0001** |
| AST (IU/L) | 42 (17 – 89) | 27 (6 – 45) | **p˂0.0001** |
| ALT (IU/L) | 20 (4 – 77) | 10 (4 – 51) | **p˂0.0001** |

**NB:** Test statistics =Mann-Whitney, Significant P values are indicated in bold fonts. HbF-Fetal Hemoglobin, RBC-Red blood cell, Hb-Hemoglobin concentration, HbS- Hemoglobin S, WBC-White blood cell count, LDH-Lactate dehydrogenase, AST-Aspartate transaminase, ALT-Alanine Transaminase
